# Supplementary material for: Comparative analyses of Mikania (Asteraceae: Eupatorieae) plastomes and impact of data partitioning and inference methods on phylogenetic relationships
Source: PubMed Central journal article supplement (PMC8225666; doi:10.1038/s41598-021-92727-6), 2021-06-24
Supplement: 41598_2021_92727_MOESM1_ESM.pdf [file 41598_2021_92727_MOESM1_ESM.pdf]

*Supplementary Material*

**Comparative analyses of *Mikania* (Asteraceae: Eupatorieae) plastomes and impact of data partitioning and inference methods on phylogenetic relationships**

**Verônica A. Thode, Caetano T. Oliveira, Benoît Loeuille, Carolina M. Siniscalchi\* and José R. Pirani<sup>5</sup>**

\* Correspondence: [carol.siniscalchi@gmail.com](mailto:carol.siniscalchi@gmail.com)

## *Supplementary Tables*

### **Comparative analyses of *Mikania* (Asteraceae: Eupatorieae) plastomes and impact of data partitioning and inference methods on phylogenetic relationships**

**Verônica A. Thode, Caetano T. Oliveira, Benoît Loeuille, Carolina M. Siniscalchi\* and José R. Pirani<sup>5</sup>**

\* Correspondence: [carol.siniscalchi@gmail.com](mailto:carol.siniscalchi@gmail.com)

**Supplementary Table 1.** Summary of the 79 protein-coding gene alignments extracted from 19 *Mikania* species plastomes: alignment length (bp), length of alignment translated in amino acids, number of variable sites, percentage of variable sites, parsimony informative sites (Pi sites), and percentage of GC content (GC%) for the nucleotide alignments.

| Gene         | Length (bp) | Length translated | Var. sites | % variable | Pi sites | GC %  |
|--------------|-------------|-------------------|------------|------------|----------|-------|
| <i>ndhE</i>  | 306         | 102               | 0          | 0.00       | 0        | 31.4% |
| <i>petD</i>  | 486         | 162               | 0          | 0.00       | 0        | 39.1% |
| <i>petG</i>  | 114         | 38                | 0          | 0.00       | 0        | 36.0% |
| <i>petL</i>  | 96          | 32                | 0          | 0.00       | 0        | 34.4% |
| <i>petN</i>  | 90          | 30                | 0          | 0.00       | 0        | 41.4% |
| <i>psaJ</i>  | 135         | 45                | 0          | 0.00       | 0        | 41.5% |
| <i>psbH</i>  | 222         | 74                | 0          | 0.00       | 0        | 38.3% |
| <i>psbL</i>  | 117         | 39                | 0          | 0.00       | 0        | 33.3% |
| <i>psbZ</i>  | 189         | 63                | 0          | 0.00       | 0        | 36.0% |
| <i>rpl23</i> | 282         | 94                | 0          | 0.00       | 0        | 39.4% |
| <i>rps7</i>  | 468         | 156               | 0          | 0.00       | 0        | 40.8% |
| <i>ndhB</i>  | 1,533       | 511               | 2          | 0.13       | 2        | 37.4% |
| <i>ndhI</i>  | 501         | 167               | 2          | 0.40       | 0        | 34.8% |
| <i>psbE</i>  | 252         | 84                | 1          | 0.40       | 0        | 41.7% |
| <i>atpH</i>  | 246         | 82                | 1          | 0.41       | 0        | 44.7% |
| <i>infA</i>  | 234         | 78                | 1          | 0.43       | 0        | 35.9% |
| <i>rps11</i> | 411         | 137               | 2          | 0.49       | 1        | 46.0% |
| <i>clpP</i>  | 592         | 197               | 3          | 0.51       | 1        | 42.1% |
| <i>ycf4</i>  | 555         | 185               | 3          | 0.54       | 1        | 38.2% |
| <i>rpl14</i> | 369         | 123               | 2          | 0.54       | 0        | 40.1% |
| <i>ndhA</i>  | 1,092       | 364               | 6          | 0.55       | 1        | 34.2% |
| <i>rps12</i> | 357         | 119               | 2          | 0.56       | 0        | 44.2% |
| <i>rpl2</i>  | 825         | 275               | 5          | 0.61       | 1        | 43.7% |
| <i>psaB</i>  | 2,205       | 735               | 14         | 0.63       | 7        | 40.3% |
| <i>atpI</i>  | 744         | 248               | 5          | 0.67       | 1        | 38.8% |
| <i>ycf2</i>  | 6831        | 2,277             | 47         | 0.69       | 12       | 37.7% |
| <i>rps2</i>  | 711         | 237               | 5          | 0.70       | 0        | 37.4% |
| <i>psaA</i>  | 2253        | 751               | 17         | 0.75       | 2        | 43.1% |
| <i>psbA</i>  | 1,062       | 354               | 8          | 0.75       | 3        | 41.9% |
| <i>rps16</i> | 267         | 89                | 2          | 0.75       | 0        | 37.9% |
| <i>psbN</i>  | 132         | 44                | 1          | 0.76       | 1        | 42.5% |
| <i>petB</i>  | 648         | 216               | 5          | 0.77       | 0        | 39.5% |
| <i>psbB</i>  | 1527        | 509               | 12         | 0.79       | 2        | 43.7% |
| <i>psbJ</i>  | 123         | 41                | 1          | 0.81       | 0        | 41.1% |
| <i>rps4</i>  | 606         | 202               | 5          | 0.83       | 1        | 39.8% |
| <i>psbF</i>  | 120         | 40                | 1          | 0.83       | 0        | 41.6% |

| Gene         | Length (bp) | Length translated | Var. sites | % variable | Pi sites | GC %  |
|--------------|-------------|-------------------|------------|------------|----------|-------|
| <i>ndhK</i>  | 678         | 226               | 6          | 0.88       | 3        | 38.5% |
| <i>rpl36</i> | 114         | 38                | 1          | 0.88       | 0        | 35.1% |
| <i>psbI</i>  | 111         | 37                | 1          | 0.90       | 0        | 36.1% |
| <i>atpA</i>  | 1,527       | 509               | 14         | 0.92       | 5        | 40.4% |
| <i>psbD</i>  | 1,062       | 354               | 10         | 0.94       | 3        | 42.6% |
| <i>rpoC1</i> | 2,07        | 690               | 20         | 0.97       | 3        | 37.9% |
| <i>rps18</i> | 306         | 102               | 3          | 0.98       | 2        | 34.0% |
| <i>ndhD</i>  | 1,521       | 507               | 15         | 0.99       | 3        | 36.1% |
| <i>ycf3</i>  | 507         | 169               | 5          | 0.99       | 3        | 39.2% |
| <i>atpE</i>  | 402         | 134               | 4          | 1.00       | 0        | 40.0% |
| <i>accD</i>  | 1,452       | 484               | 15         | 1.03       | 5        | 36.3% |
| <i>atpF</i>  | 555         | 185               | 6          | 1.08       | 2        | 37.7% |
| <i>ndhC</i>  | 363         | 121               | 4          | 1.10       | 0        | 34.2% |
| <i>psbK</i>  | 180         | 60                | 2          | 1.11       | 1        | 37.2% |
| <i>psaC</i>  | 246         | 82                | 3          | 1.22       | 1        | 42.3% |
| <i>rpoB</i>  | 3,183       | 1,061             | 39         | 1.23       | 10       | 38.4% |
| <i>petA</i>  | 963         | 321               | 12         | 1.25       | 5        | 40.3% |
| <i>ndhJ</i>  | 477         | 159               | 6          | 1.26       | 2        | 39.8% |
| <i>ndhH</i>  | 1,182       | 394               | 15         | 1.27       | 4        | 37.9% |
| <i>rpl22</i> | 465         | 155               | 6          | 1.29       | 1        | 34.2% |
| <i>ndhG</i>  | 531         | 177               | 7          | 1.32       | 3        | 36.0% |
| <i>psbC</i>  | 1,422       | 474               | 20         | 1.41       | 4        | 43.3% |
| <i>rps15</i> | 279         | 93                | 4          | 1.43       | 1        | 32.7% |
| <i>cemA</i>  | 690         | 230               | 10         | 1.45       | 2        | 32.9% |
| <i>rpl16</i> | 411         | 137               | 6          | 1.46       | 1        | 41.9% |
| <i>atpB</i>  | 1,497       | 499               | 24         | 1.60       | 4        | 42.0% |
| <i>rps14</i> | 303         | 101               | 5          | 1.65       | 3        | 41.9% |
| <i>rps19</i> | 279         | 93                | 5          | 1.79       | 1        | 33.4% |
| <i>psaI</i>  | 111         | 37                | 2          | 1.80       | 0        | 36.9% |
| <i>rpoC2</i> | 4,146       | 1,382             | 77         | 1.86       | 25       | 38.0% |
| <i>psbM</i>  | 105         | 35                | 2          | 1.90       | 1        | 28.7% |
| <i>rps8</i>  | 405         | 135               | 8          | 1.98       | 7        | 36.5% |
| <i>rpl33</i> | 201         | 67                | 4          | 1.99       | 0        | 40.3% |
| <i>rpl20</i> | 381         | 127               | 8          | 2.10       | 3        | 37.1% |
| <i>rps3</i>  | 657         | 219               | 14         | 2.13       | 11       | 33.8% |
| <i>matK</i>  | 1,515       | 505               | 34         | 2.24       | 7        | 33.7% |
| <i>rbcL</i>  | 1,458       | 486               | 34         | 2.33       | 24       | 43.6% |
| <i>ccsA</i>  | 969         | 323               | 23         | 2.37       | 6        | 31.6% |
| <i>rpl32</i> | 165         | 55                | 4          | 2.42       | 2        | 34.4% |
| <i>ndhF</i>  | 2,226       | 742               | 54         | 2.43       | 20       | 32.4% |
| <i>psbT</i>  | 102         | 34                | 3          | 2.94       | 3        | 32.8% |

---

| <b>Gene</b> | <b>Length (bp)</b> | <b>Length translated</b> | <b>Var. sites</b> | <b>% variable</b> | <b>Pi sites</b> | <b>GC %</b> |
|-------------|--------------------|--------------------------|-------------------|-------------------|-----------------|-------------|
| <i>rpoA</i> | 816                | 272                      | 28                | 3.43              | 6               | 36.4%       |
| <i>ycf1</i> | 5,088              | 1,696                    | 195               | 3.83              | 65              | 29.6%       |

---

**Supplementary Table 2.** Summary of the 49 alignments of intergenic regions extracted from 19 *Mikania* species plastomes: alignment length (bp), length of alignment translated in amino acids, number of variable sites, percentage of variable sites, parsimony informative sites (Pi sites), and percentage of GC content (GC%) for the nucleotide alignments.

| Intergenic region        | Length (bp) | Var. sites | % variable | Pi sites | GC % |
|--------------------------|-------------|------------|------------|----------|------|
| <i>trnL-CAA-ycf2</i>     | 412         | 2          | 0.5        | 2        | 45.6 |
| <i>ycf2-trnL-CAA</i>     | 412         | 2          | 0.5        | 2        | 45.1 |
| <i>trnN-GUU-ycf1</i>     | 320         | 2          | 0.6        | 0        | 37.2 |
| <i>ycf1-trnN-GUU</i>     | 320         | 2          | 0.6        | 0        | 37.2 |
| <i>ndhB-trnL-CAA</i>     | 568         | 4          | 0.7        | 2        | 37.1 |
| <i>trnL-CAA-ndhB</i>     | 573         | 4          | 0.7        | 2        | 36.6 |
| <i>trnV-GAC-ycf15</i>    | 690         | 6          | 0.9        | 3        | 41.2 |
| <i>ycf15-trnV-GAC</i>    | 690         | 6          | 0.9        | 3        | 41.4 |
| <i>rps7-ycf15</i>        | 1909        | 20         | 1          | 12       | 38.9 |
| <i>ycf15-rps7</i>        | 1918        | 20         | 1          | 12       | 39   |
| <i>trnP-UGG-psaJ</i>     | 325         | 5          | 1.5        | 1        | 28.8 |
| <i>trnN-GUU-trnR-ACG</i> | 495         | 8          | 1.6        | 1        | 45.7 |
| <i>trnR-ACG-trnN-GUU</i> | 501         | 8          | 1.6        | 1        | 45.2 |
| <i>psaJ-rpl33</i>        | 443         | 8          | 1.8        | 1        | 32.5 |
| <i>trnSUGA-psbZ</i>      | 339         | 7          | 2.1        | 1        | 35.5 |
| <i>rbcL-aacD</i>         | 596         | 13         | 2.2        | 3        | 30.6 |
| <i>psbE-petL</i>         | 1358        | 31         | 2.3        | 13       | 29.5 |
| <i>rpl20-clpP</i>        | 1058        | 26         | 2.5        | 12       | 34.6 |
| <i>rps4-trnT-UGU</i>     | 387         | 10         | 2.6        | 4        | 24   |
| <i>clpP-psbB</i>         | 471         | 14         | 3          | 3        | 30.5 |
| <i>trnTGGU-psbD</i>      | 1258        | 38         | 3          | 10       | 31   |
| <i>accD-psaI</i>         | 809         | 25         | 3.1        | 9        | 23.7 |
| <i>atpH-atpF</i>         | 378         | 12         | 3.2        | 6        | 31.3 |
| <i>psbM-trnDGUC</i>      | 679         | 22         | 3.2        | 9        | 34.1 |
| <i>ycf3-trnSGGA</i>      | 979         | 32         | 3.3        | 14       | 28.4 |
| <i>atpB-rbcL</i>         | 849         | 31         | 3.7        | 8        | 30   |
| <i>psaA-ycf3</i>         | 802         | 30         | 3.7        | 13       | 30.7 |
| <i>psbK-psbI</i>         | 428         | 16         | 3.7        | 10       | 31.2 |
| <i>rps16-psbK</i>        | 1478        | 54         | 3.7        | 24       | 29.5 |
| <i>trnSGCU-trnCGCA</i>   | 780         | 31         | 4          | 14       | 29.9 |
| <i>trnSGGA-rps4</i>      | 379         | 15         | 4          | 4        | 34.9 |
| <i>atpI-atpH</i>         | 1230        | 50         | 4.1        | 20       | 31.1 |
| <i>trnCGCA-petN</i>      | 874         | 36         | 4.1        | 13       | 32.5 |
| <i>ndhC-trnV-UAC</i>     | 1317        | 56         | 4.3        | 25       | 29.5 |
| <i>ycf4-cemA</i>         | 924         | 40         | 4.3        | 12       | 30   |
| <i>matK-rps16</i>        | 1704        | 75         | 4.4        | 27       | 29.8 |
| <i>psbZ-trnCGGC</i>      | 340         | 15         | 4.4        | 7        | 31.1 |

|                          |      |    |     |    |      |
|--------------------------|------|----|-----|----|------|
| <i>ndhI-ndhG</i>         | 423  | 19 | 4.5 | 6  | 23.6 |
| <i>trnEUUC-rpoB</i>      | 955  | 45 | 4.7 | 12 | 33.5 |
| <i>trnT-UGU-trnL-UAA</i> | 595  | 28 | 4.7 | 15 | 27.5 |
| <i>psbA-matK</i>         | 648  | 32 | 4.9 | 8  | 29.2 |
| <i>trnL-UAA-trnF-GAA</i> | 348  | 17 | 4.9 | 6  | 33.8 |
| <i>psaI-ycf4</i>         | 412  | 21 | 5.1 | 7  | 34.7 |
| <i>ycfI-rps15</i>        | 442  | 23 | 5.2 | 5  | 25.8 |
| <i>trnL-UAG-rpl32</i>    | 865  | 52 | 6   | 26 | 24.7 |
| <i>petA-psbJ</i>         | 868  | 54 | 6.2 | 20 | 29.7 |
| <i>petN-psbM</i>         | 590  | 41 | 6.9 | 13 | 28   |
| <i>rpl32-ndhF</i>        | 1099 | 84 | 7.6 | 31 | 24.5 |
| <i>trnH-GUG-psbA</i>     | 510  | 45 | 8.8 | 27 | 24.9 |

**Supplementary Table 3.** Results from the distribution of SSRs in the plastomes of the 19 *Mikania* species studied here and that of *Ageratina fastigiata*, *Lithothamnus nitidus*, and *Stevia collina* (Eupatorieae).

| Species                     | SSRs total | Unit size |    |     |       |       |      | Total per region |    |     | Repeat type |                             |           |           |
|-----------------------------|------------|-----------|----|-----|-------|-------|------|------------------|----|-----|-------------|-----------------------------|-----------|-----------|
|                             |            | mono      | di | tri | tetra | penta | hexa | LSC              | IR | SSC | A/T repeats | % of A/T repeats from total | A repeats | T repeats |
| <i>Mikania additicia</i>    | 44         | 28        | 6  | 3   | 6     | 0     | 1    | 36               | 4  | 4   | 26          | 59.1                        | 12        | 14        |
| <i>Mikania brevifauca</i>   | 40         | 24        | 5  | 3   | 7     | 0     | 1    | 31               | 4  | 5   | 24          | 60.0                        | 11        | 13        |
| <i>Mikania burchelii</i>    | 36         | 22        | 5  | 2   | 6     | 0     | 1    | 26               | 2  | 8   | 21          | 58.3                        | 9         | 12        |
| <i>Mikania decora</i>       | 36         | 22        | 5  | 3   | 5     | 0     | 1    | 27               | 4  | 5   | 21          | 58.3                        | 11        | 10        |
| <i>Mikania decumbens</i>    | 41         | 27        | 5  | 3   | 5     | 0     | 1    | 32               | 5  | 4   | 26          | 63.4                        | 10        | 16        |
| <i>Mikania fasciculata</i>  | 42         | 29        | 4  | 3   | 6     | 0     | 0    | 31               | 2  | 9   | 29          | 69.0                        | 13        | 16        |
| <i>Mikania glomerata</i>    | 38         | 23        | 5  | 3   | 6     | 0     | 1    | 30               | 2  | 6   | 23          | 60.5                        | 10        | 13        |
| <i>Mikania haenkeana</i>    | 38         | 23        | 5  | 3   | 6     | 0     | 1    | 29               | 3  | 6   | 22          | 57.9                        | 11        | 11        |
| <i>Mikania lehmanii</i>     | 35         | 21        | 5  | 3   | 5     | 0     | 1    | 27               | 3  | 5   | 19          | 54.3                        | 9         | 10        |
| <i>Mikania neurocaula</i>   | 42         | 27        | 5  | 3   | 6     | 0     | 1    | 32               | 3  | 7   | 27          | 64.3                        | 12        | 15        |
| <i>Mikania oblongifolia</i> | 37         | 22        | 5  | 3   | 6     | 0     | 1    | 28               | 2  | 7   | 22          | 59.5                        | 11        | 11        |
| <i>Mikania obtusata</i>     | 39         | 24        | 5  | 3   | 6     | 0     | 1    | 30               | 3  | 6   | 24          | 61.5                        | 11        | 13        |
| <i>Mikania parvifolia</i>   | 42         | 27        | 5  | 3   | 6     | 0     | 1    | 32               | 4  | 6   | 26          | 61.9                        | 12        | 14        |
| <i>Mikania purpurescens</i> | 43         | 27        | 5  | 3   | 6     | 1     | 1    | 32               | 4  | 7   | 27          | 62.8                        | 12        | 15        |
| <i>Mikania salviifolia</i>  | 34         | 20        | 5  | 3   | 6     | 0     | 0    | 25               | 2  | 7   | 20          | 58.8                        | 9         | 11        |
| <i>Mikania smaragdina</i>   | 41         | 25        | 5  | 3   | 7     | 0     | 1    | 31               | 3  | 7   | 24          | 58.5                        | 12        | 12        |
| <i>Mikania sylvatica</i>    | 37         | 24        | 5  | 2   | 5     | 0     | 1    | 26               | 0  | 11  | 22          | 59.5                        | 10        | 12        |
| <i>Mikania ternata</i>      | 40         | 23        | 5  | 5   | 7     | 0     | 0    | 30               | 4  | 6   | 23          | 57.5                        | 9         | 14        |
| <i>Mikania triangularis</i> | 37         | 22        | 5  | 3   | 6     | 0     | 1    | 31               | 0  | 6   | 22          | 59.5                        | 11        | 11        |
| <b>Outgroups</b>            |            |           |    |     |       |       |      |                  |    |     |             |                             |           |           |
| <i>Ageratina fastigiata</i> | 51         | 37        | 3  | 4   | 6     | 0     | 1    | 38               | 6  | 7   | 36          | 70.6                        | 15        | 21        |
| <i>Lithothamnus nitidus</i> | 49         | 28        | 7  | 3   | 8     | 2     | 1    | 36               | 1  | 12  | 26          | 53.1                        | 14        | 12        |
| <i>Stevia collina</i>       | 38         | 22        | 6  | 1   | 6     | 2     | 1    | 28               | 2  | 8   | 20          | 52.6                        | 12        | 8         |



**Supplementary Table 4.** Results from the REPuter analysis of distribution of repeat sequences in the plastomes of the *Mikania* species studied here plus *Ageratina fastigiata*, *Lithothamnus nitidus*, and *Stevia collina*, all belonging to tribe Eupatorieae. F = forward, P = palindrome, and R reverse repeats.

| Species                     | Total | Total repeats per region |    |     | Repeat type |    |    |   | Maximum size | Number of repeats per size |         |         |         |         |       |
|-----------------------------|-------|--------------------------|----|-----|-------------|----|----|---|--------------|----------------------------|---------|---------|---------|---------|-------|
|                             |       | LSC                      | IR | SSC | F           | P  | R  | C |              | 30-33bp                    | 34-37bp | 38-41bp | 42-45bp | 46-49bp | >49bp |
| <i>Mikania additicia</i>    | 27    | 23                       | 4  | 0   | 8           | 6  | 13 | 0 | 48           | 12                         | 7       | 5       | 1       | 2       | 0     |
| <i>Mikania brevifauca</i>   | 21    | 16                       | 5  | 0   | 13          | 8  | 0  | 0 | 48           | 12                         | 3       | 2       | 2       | 2       | 0     |
| <i>Mikania burchelii</i>    | 21    | 16                       | 5  | 0   | 13          | 8  | 0  | 0 | 48           | 12                         | 3       | 3       | 1       | 2       | 0     |
| <i>Mikania decora</i>       | 17    | 13                       | 4  | 0   | 10          | 7  | 0  | 0 | 48           | 11                         | 2       | 3       | 0       | 1       | 0     |
| <i>Mikania decumbens</i>    | 45    | 40                       | 5  | 0   | 23          | 9  | 13 | 0 | 48           | 28                         | 9       | 3       | 3       | 2       | 0     |
| <i>Mikania fasciculata</i>  | 27    | 16                       | 5  | 6   | 14          | 9  | 3  | 1 | 48           | 15                         | 5       | 2       | 2       | 3       | 0     |
| <i>Mikania glomerata</i>    | 34    | 29                       | 5  | 0   | 18          | 9  | 7  | 0 | 48           | 25                         | 3       | 3       | 1       | 2       | 0     |
| <i>Mikania haenkeana</i>    | 19    | 14                       | 5  | 0   | 12          | 7  | 0  | 0 | 48           | 11                         | 3       | 3       | 1       | 1       | 0     |
| <i>Mikania lehmanii</i>     | 44    | 39                       | 5  | 0   | 21          | 13 | 8  | 2 | 48           | 35                         | 3       | 3       | 1       | 2       | 0     |
| <i>Mikania neurocaula</i>   | 20    | 15                       | 5  | 0   | 12          | 8  | 0  | 0 | 48           | 11                         | 3       | 3       | 1       | 2       | 0     |
| <i>Mikania oblongifolia</i> | 20    | 15                       | 5  | 0   | 12          | 8  | 0  | 0 | 48           | 11                         | 3       | 3       | 1       | 2       | 0     |
| <i>Mikania obtusata</i>     | 22    | 17                       | 5  | 0   | 13          | 8  | 1  | 0 | 48           | 12                         | 4       | 3       | 1       | 2       | 0     |
| <i>Mikania parvifolia</i>   | 22    | 17                       | 5  | 0   | 13          | 8  | 0  | 1 | 48           | 14                         | 2       | 3       | 1       | 2       | 0     |
| <i>Mikania purpurescens</i> | 35    | 27                       | 5  | 3   | 15          | 14 | 4  | 2 | 48           | 24                         | 5       | 2       | 2       | 2       | 0     |
| <i>Mikania salviifolia</i>  | 22    | 17                       | 5  | 0   | 14          | 8  | 0  | 0 | 48           | 12                         | 2       | 3       | 3       | 2       | 0     |
| <i>Mikania smaragdina</i>   | 23    | 18                       | 5  | 0   | 12          | 10 | 1  | 0 | 48           | 14                         | 2       | 4       | 1       | 2       | 0     |
| <i>Mikania sylvatica</i>    | 20    | 14                       | 5  | 1   | 11          | 8  | 1  | 0 | 48           | 12                         | 2       | 3       | 1       | 2       | 0     |
| <i>Mikania ternata</i>      | 20    | 16                       | 4  | 0   | 11          | 9  | 0  | 0 | 48           | 13                         | 2       | 2       | 1       | 2       | 0     |
| <i>Mikania triangularis</i> | 21    | 16                       | 5  | 0   | 13          | 8  | 0  | 0 | 48           | 13                         | 2       | 3       | 1       | 2       | 0     |
| <b>Outgroups</b>            |       |                          |    |     |             |    |    |   |              |                            |         |         |         |         |       |
| <i>Ageratina fastigiata</i> | 31    | 15                       | 16 | 0   | 14          | 8  | 9  | 0 | 46           | 22                         | 3       | 3       | 2       | 1       | 0     |
| <i>Lithothamnus nitidus</i> | 17    | 11                       | 5  | 1   | 8           | 9  | 0  | 0 | 58           | 11                         | 0       | 4       | 0       | 1       | 1     |
| <i>Stevia collina</i>       | 17    | 14                       | 3  | 0   | 8           | 9  | 0  | 0 | 48           | 8                          | 2       | 6       | 0       | 0       | 1     |

**Supplementary Table 5.** Adjusted pairwise Robinson-Foulds distances calculated among all six topologies. Values range from ranges from 0 (similar topologies) to 1 (completely discordant topologies). Astral: multispecies coalescent analyses, RAxML: concatenated maximum likelihood analyses, CDS: coding regions only, IG: non-coding regions only, total: both CDS and IG regions combined.

| Topology            | Astral CDS | Astral IG | Astral Total | RAxML CDS | RAxML IG | RAxML Total |
|---------------------|------------|-----------|--------------|-----------|----------|-------------|
| <b>Astral CDS</b>   | 0          | –         | –            | –         | –        | –           |
| <b>Astral IG</b>    | 0.45       | 0         | –            | –         | –        | –           |
| <b>Astral Total</b> | 0.25       | 0.25      | 0            | –         | –        | –           |
| <b>RAxML CDS</b>    | 0.25       | 0.35      | 0.25         | 0         | –        | –           |
| <b>RAxML IG</b>     | 0.3        | 0.2       | 0.3          | 0.15      | 0        | –           |
| <b>RAxML Total</b>  | 0.25       | 0.25      | 0.25         | 0.1       | 0.05     | 0           |

## *Supplementary Figures*

### **Comparative analyses of *Mikania* (Asteraceae: Eupatorieae) plastomes and impact of data partitioning and inference methods on phylogenetic relationships**

Verônica A. Thode, Caetano T. Oliveira, Benoît Loeuille, Carolina M. Siniscalchi\* and José R. Pirani<sup>5</sup>

\* Correspondence: [carol.siniscalchi@gmail.com](mailto:carol.siniscalchi@gmail.com)

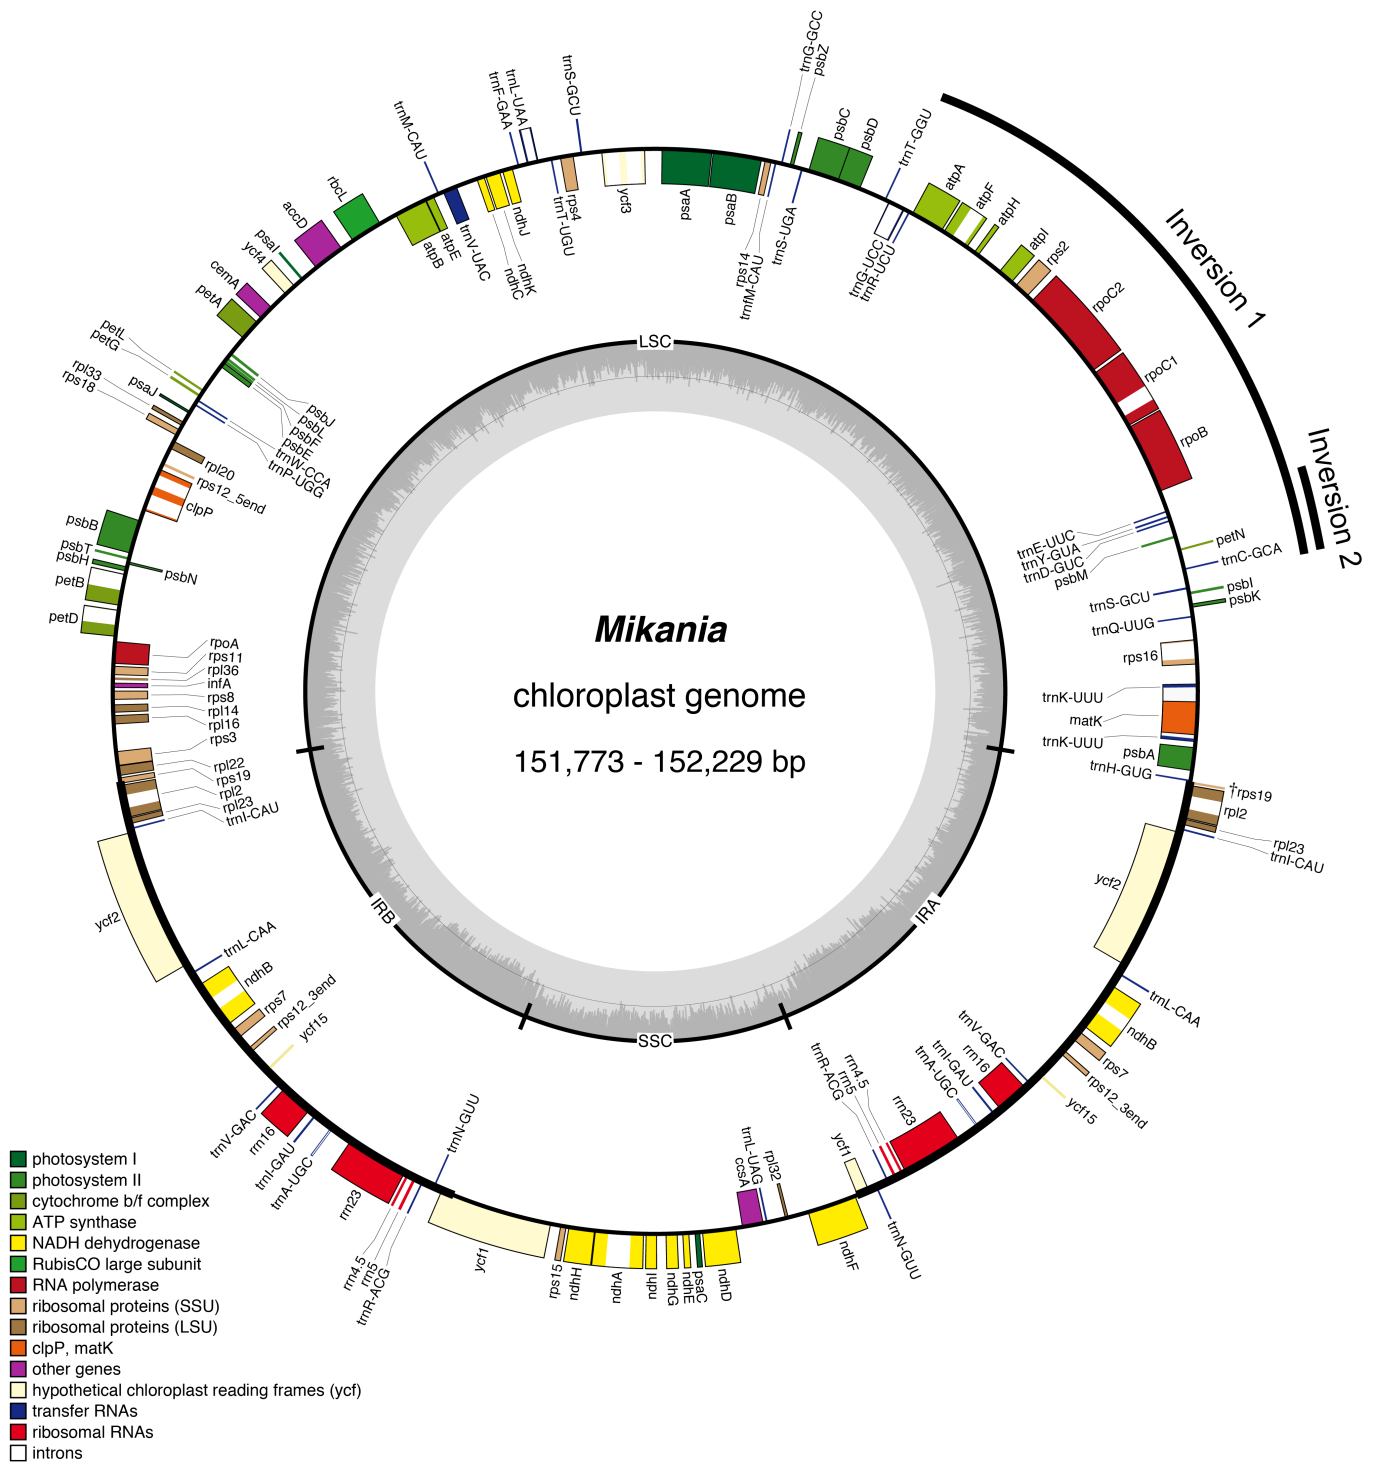

**Supplementary Figure 1.** Chloroplast genome map of the 19 *Mikania* plastomes assembled in this study. Genes drawn inside the circle are transcribed clockwise, and those drawn outside are transcribed counterclockwise. Genes belonging to different functional groups are colored according to the legend. The darker gray in the inner circle correspond to GC content, while the lighter gray to AT content.

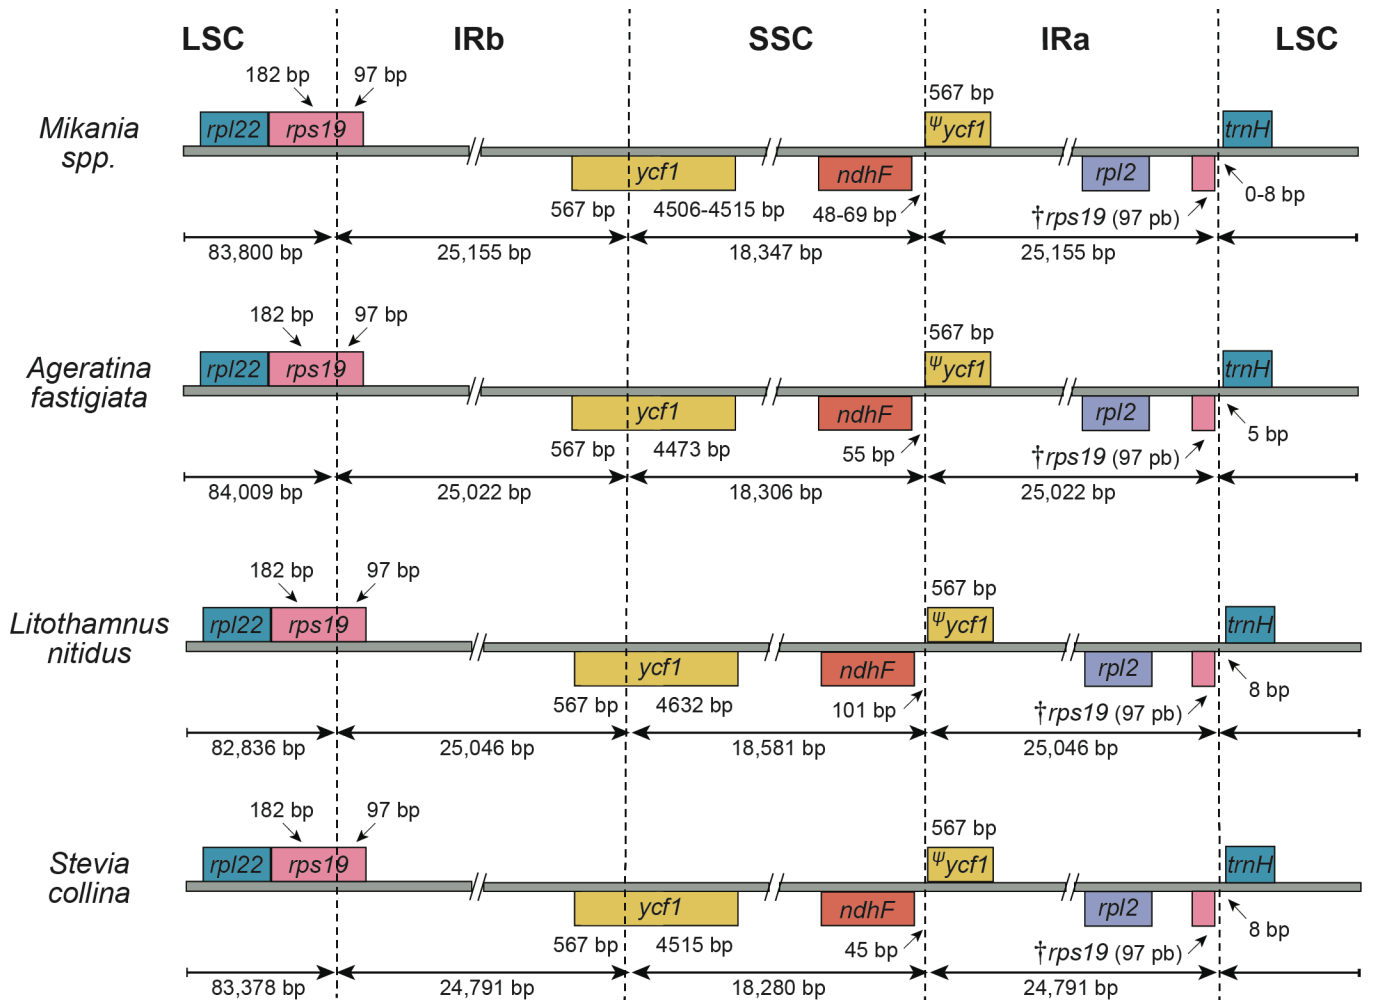

**Supplementary Figure 2.** Comparisons of the chloroplast genome boundaries between the Large Single Copy (LSC), Inverted Repeat a (IRa), Small Single Copy (SSC), and Inverted Repeat b (IRb) among the *Mikania* plastomes species sequenced here and three other species from tribe Eupatorieae, i.e., *Ageratina fastigiata*, *Lithamnus nitidus*, and *Stevia collina*. Genes shown above the lines are transcribed forward and those below are transcribed reversely. Minimum and maximum sizes for the structures are indicated in base pairs (bp).

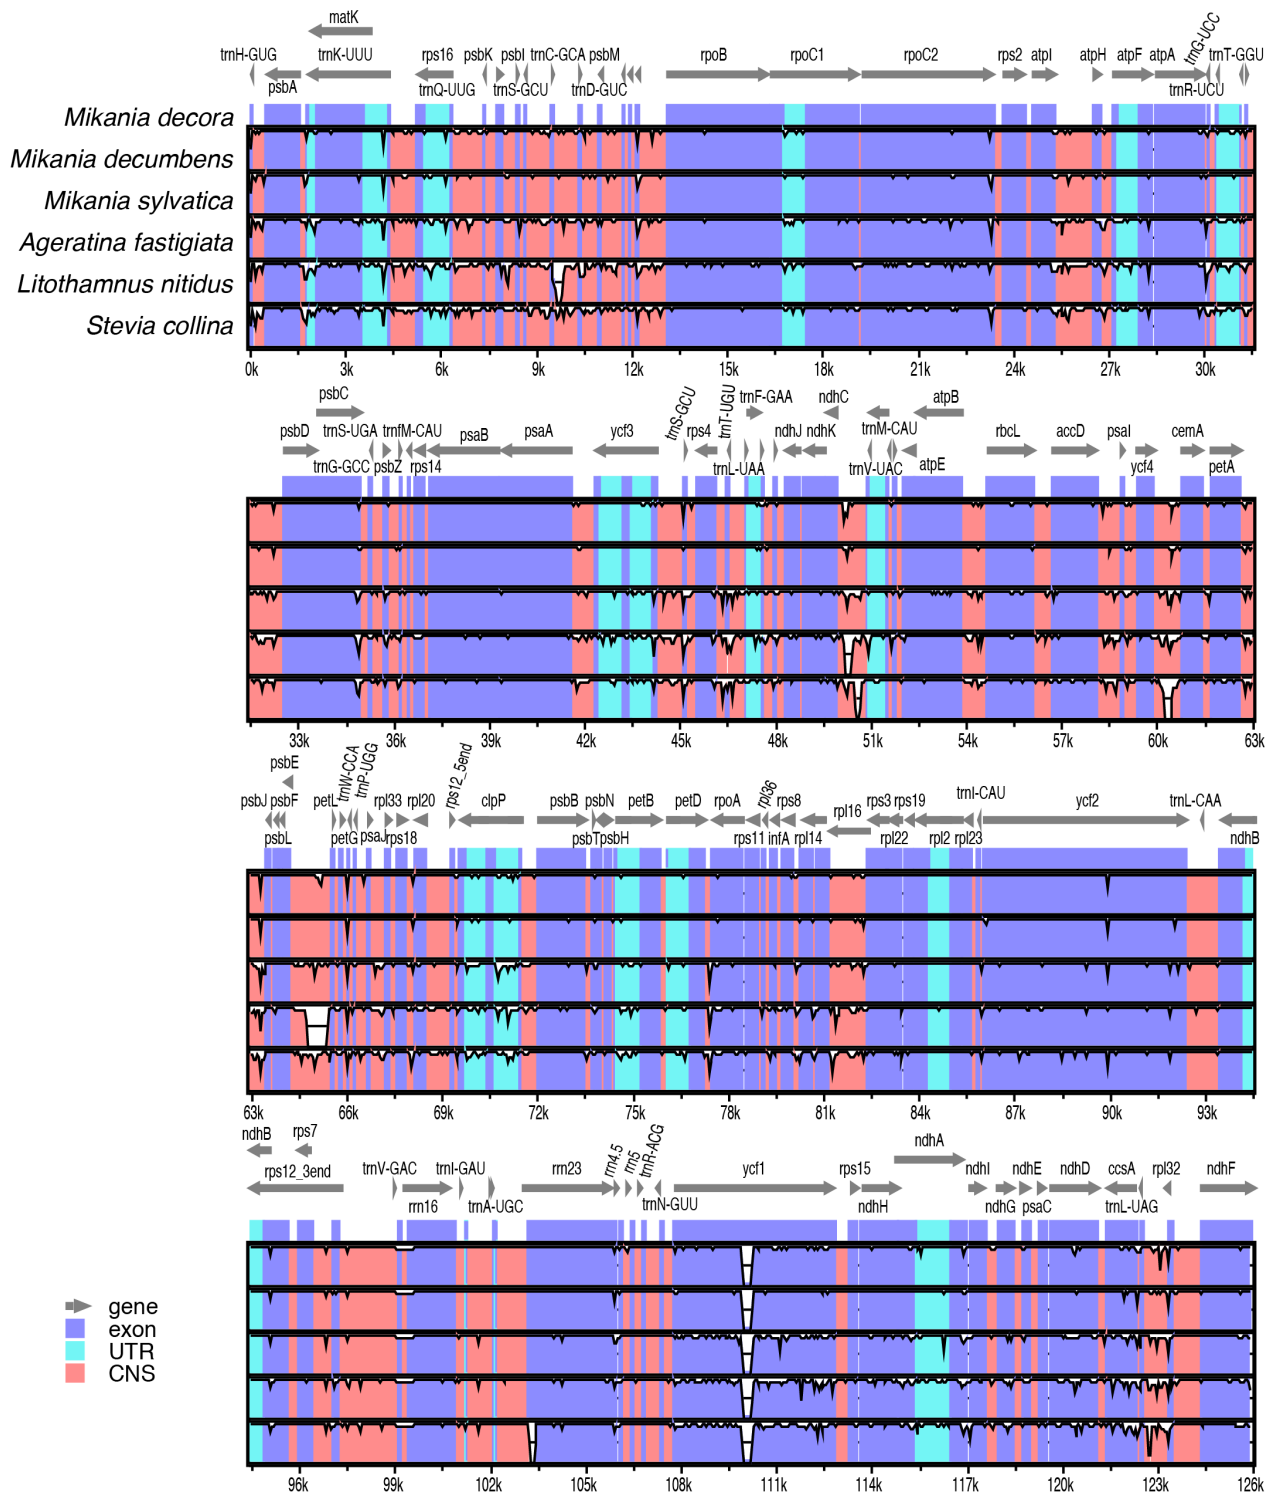

**Supplementary Figure 3.** Structural alignment using mVISTA among the plastomes of three selected *Mikania* species (i.e., *M. decora*, *M. decumbens*, and *M. sylvatica*), *Ageratina fastigiata*, *Lithothamnus nitidus*, and *Stevia collina*. The plastome of *M. decora* was used as reference. Gray arrows indicate the direction of gene transcription. The y-axis represent sequence identity as a percentage between 50 and 100%.

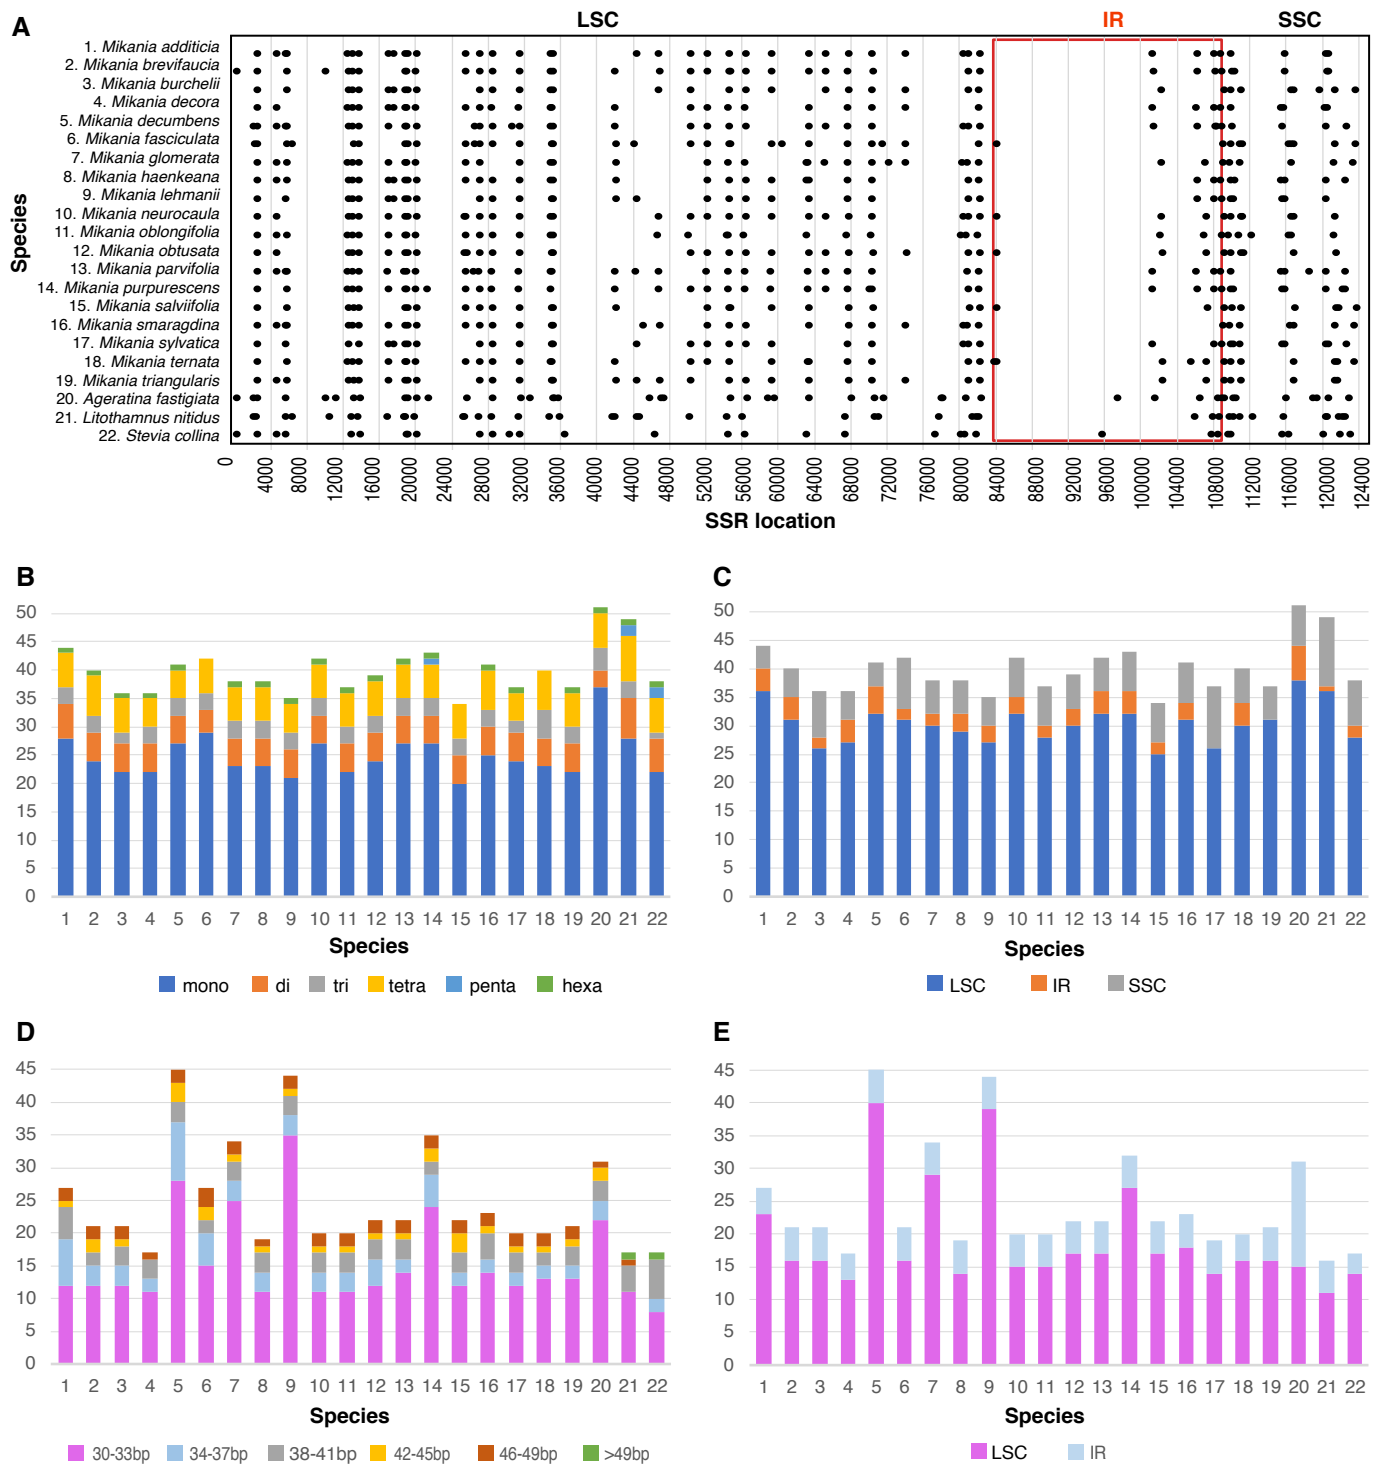

**Supplementary Figure 4.** (A) Distribution of SSRs in 19 *Mikania* species, *Ageratina fastigiata*, *Lithamnus nitidus*, and *Stevia collina* plastomes assembled in this study. (B) Distribution of SSR types. (C) Distribution of SSRs in the plastome regions. (D) Distribution and length of tandem repeats. (E) Distribution of tandem repeats in genomic regions. Taxa numbers are according to species list in A.

**Supplementary Figure 5.** Gene discordance analyses. The upper number in each branch indicates the number of concordant gene trees and the lower number the number of conflicting gene trees. Pie charts indicate the proportion of gene trees that support that clade (blue), the proportion that supports the main alternative for that clade (green), the proportion that supports all other topologies (red). (A) Astral topology of the coding dataset. (B) Astral topology of the non-coding dataset

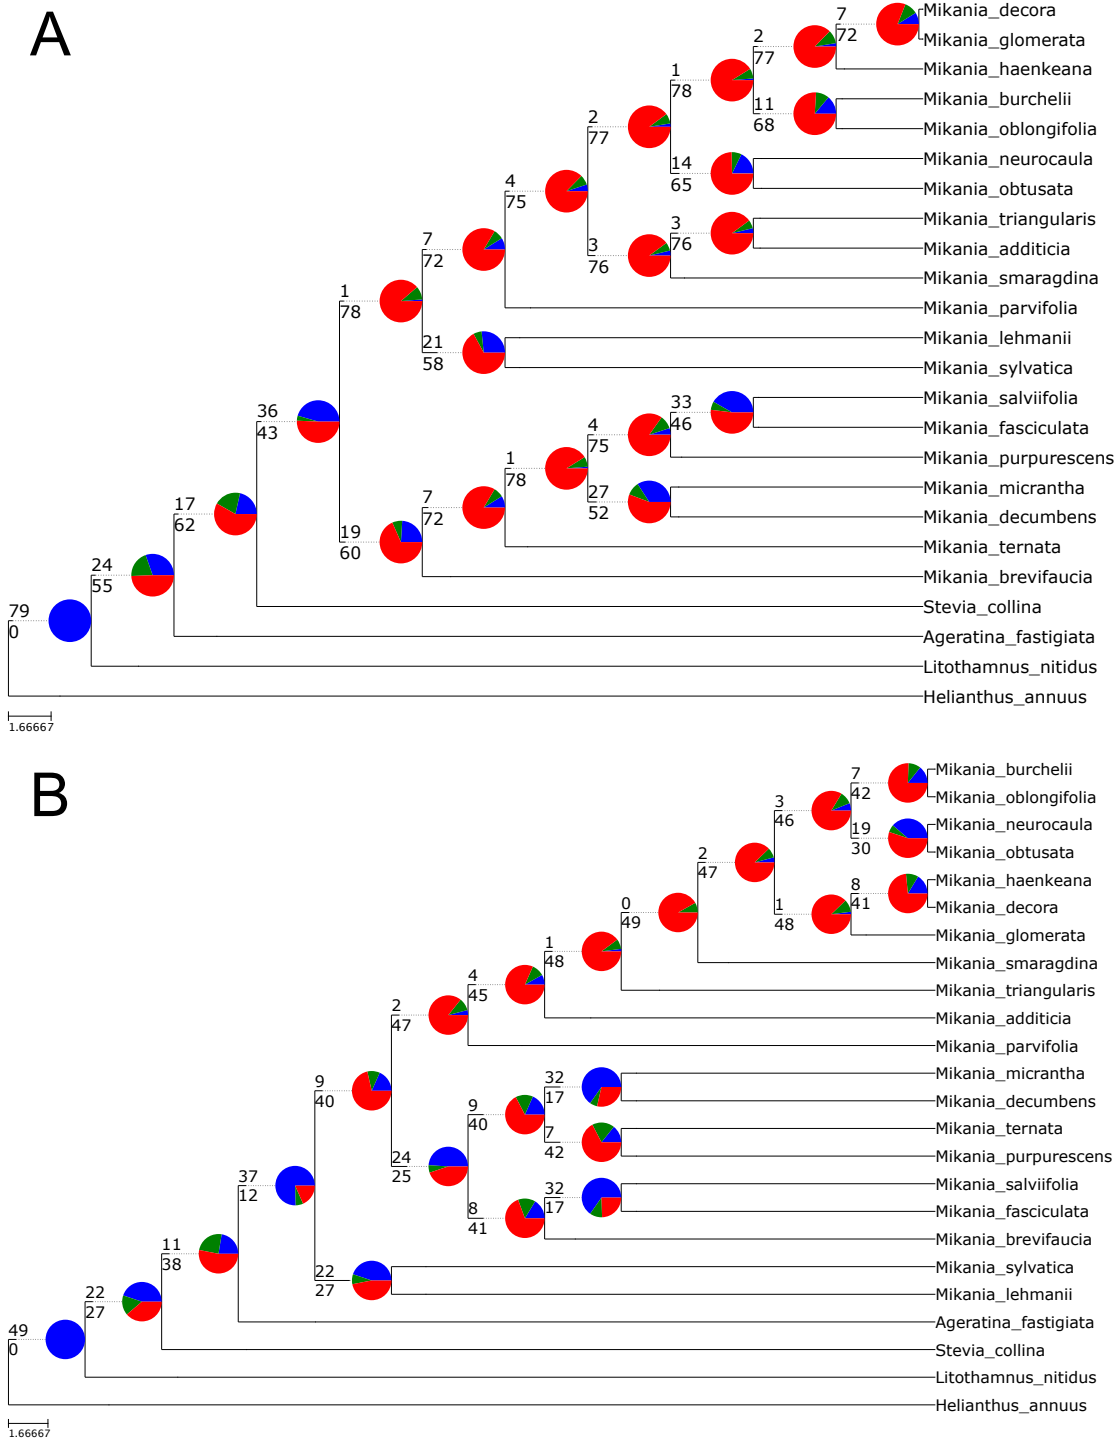



**Supplementary Figure 6.** Alignment of *ycf1* gene of the species sequenced in this study plus the *ycf1* gene from other Eupatorieae plastomes available in GenBank. The darker regions in the alignment correspond to variations between the sequences and the larger darker regions in *Praxelis clematidea* (NC023833.1) and *Ageratina adenophora* (JF826503.1) inside the red box correspond to an inversion within the *ycf1* gene in these plastomes. *Ageratum* is *Ageratum conyzoides* (MK905238).

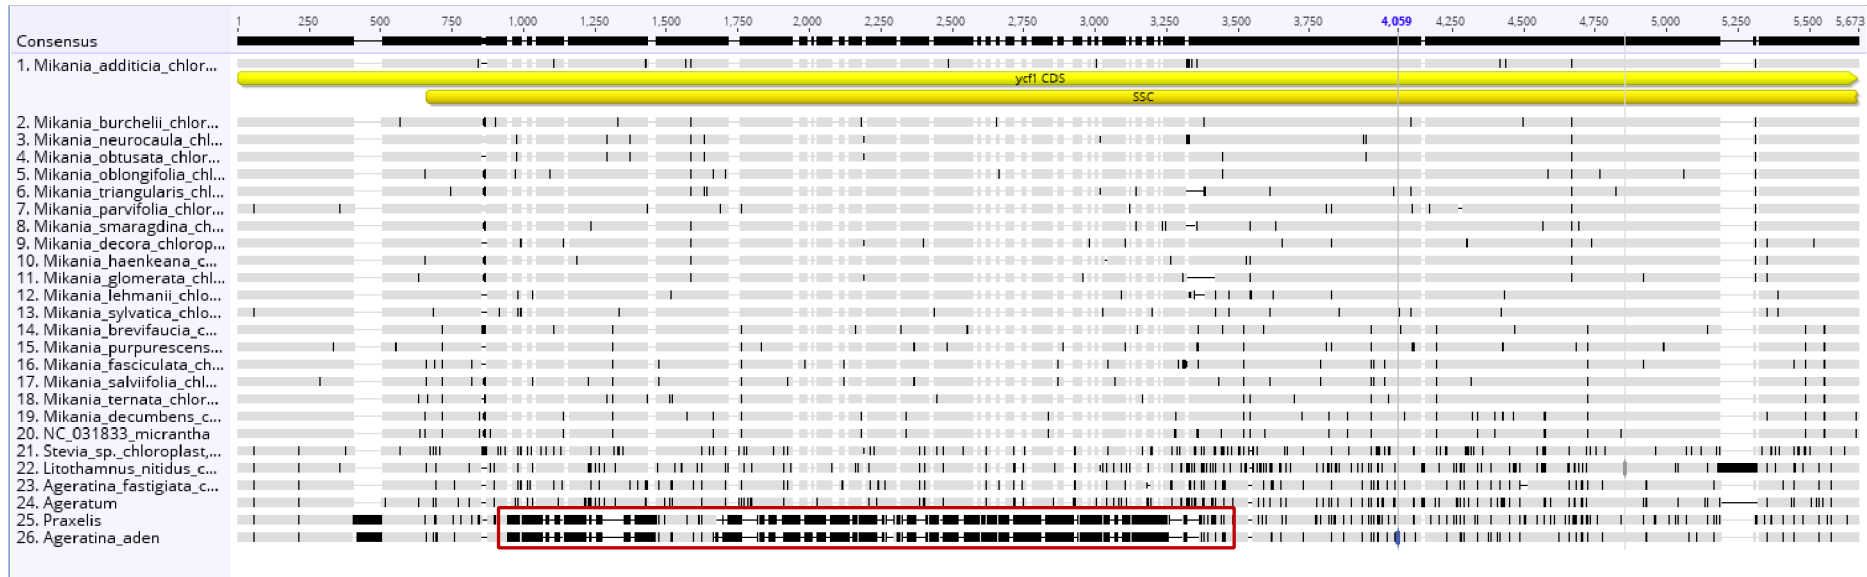

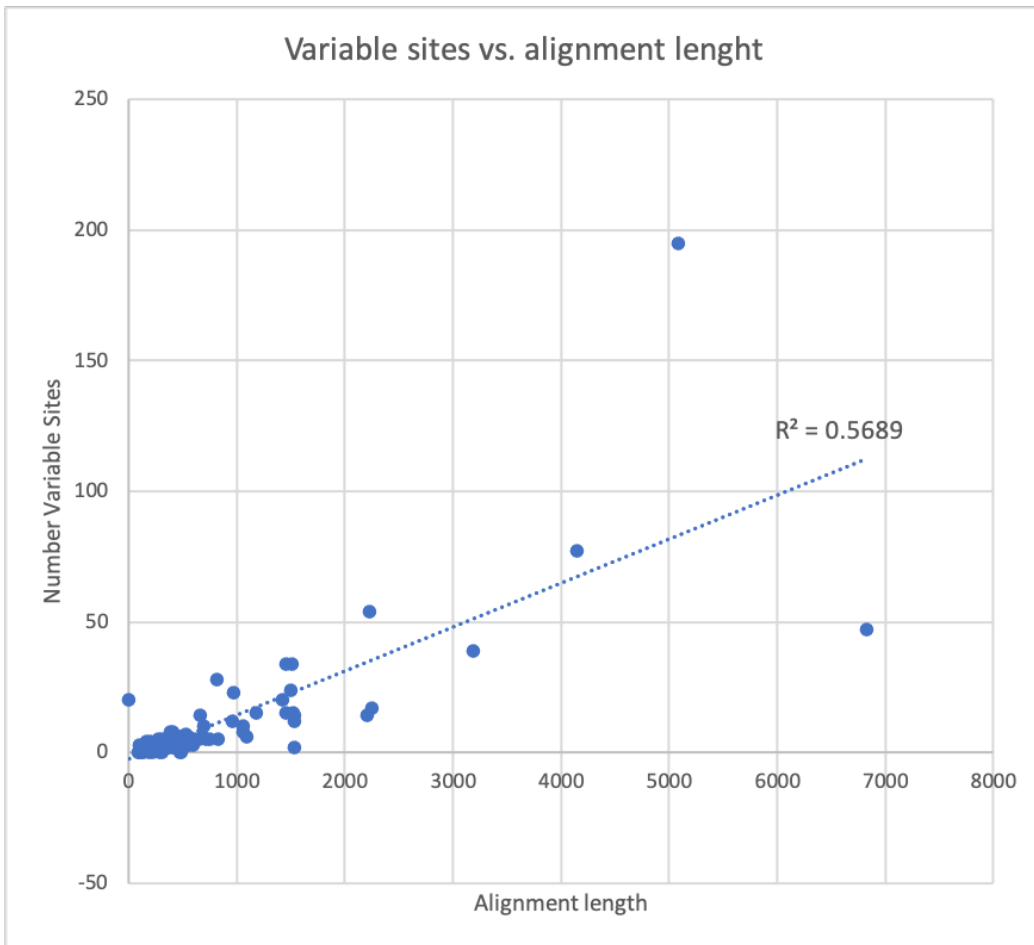

**Supplementary Figure 7.** Correlation between alignment length and number of variable sites in the coding dataset (CDS). The whole length of each CDS was considered. Pearson correlation coefficient = 0.754260077.
